# Supplementary material for: Fabrication of ZnO/CNTs for Application in CO2 Sensor at Room Temperature
Source: MDPI journal article supplement (doi:10.3390/nano11113087), 2021-11-16
Supplement: s1 [file s1]

## Supplementary data

### Fabrication of ZnO/CNTs for application in CO<sub>2</sub> sensor at room temperature

Rana Saad<sup>1</sup>, Ahmed Gamal<sup>1</sup>, Mohamed Zayed<sup>1</sup>, Ashour M. Ahmed<sup>1</sup>, Mohamed Shaban<sup>1,2\*</sup>,  
Mohammad BinSabt<sup>3</sup>, Mohamed Rabia<sup>1,4</sup>, Hany Hamdy<sup>1</sup>

<sup>1</sup> Nanophotonics and Applications Lab, Physics Department, Faculty of Science, Beni-Suef University, Beni-Suef 62514, Egypt

<sup>2</sup> Department of Physics, Faculty of Science, Islamic University of Madinah, P. O. Box: 170, AlMadinah Almonawara 42351, Saudi Arabia

<sup>3</sup> Chemistry Department, Faculty of Science, Kuwait University, P.O. Box 5969, Safat 13060, Kuwait

<sup>4</sup> Polymer Research Laboratory, Chemistry Department, Faculty of Science, Beni-Suef University, Beni-Suef 62511, Egypt

\* Correspondence: mssfadel@aucegypt.edu

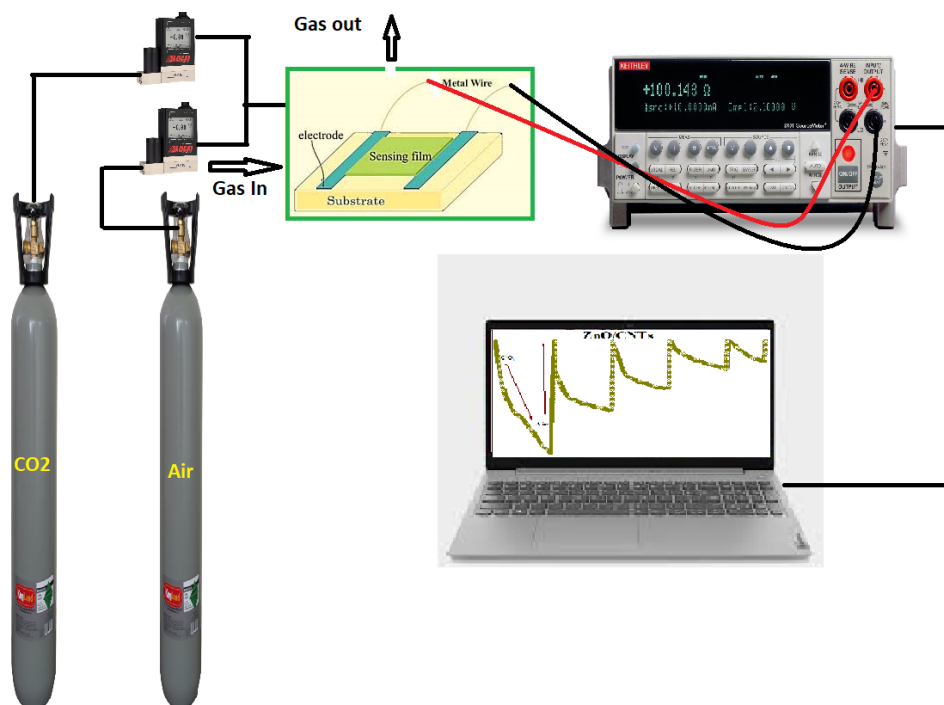

**Figure S1.** Schematic diagram for the homemade CO<sub>2</sub> gas sensor testing system.
